# Supplementary material for: Longitudinal RNA-Seq analysis of acute and chronic neurogenic skeletal muscle atrophy
Source: PubMed Central journal article supplement (PMC6760191; doi:10.1038/s41597-019-0185-4), 2019-09-24
Supplement: 41597_2019_185_MOESM1_ESM.pdf [file 41597_2019_185_MOESM1_ESM.pdf]

**Table S1. Metadata of all sequenced samples comprising the dataset.**

| Sample ID | Status | Gender | Age (months) | Denervation Duration (days) | SRASampleID  | Fastq file datalink                                                                                           |
|-----------|--------|--------|--------------|-----------------------------|--------------|---------------------------------------------------------------------------------------------------------------|
| CTL-0-1   | CTL    | male   | 5            | 0                           | SAMN11603134 | <a href="https://www.ncbi.nlm.nih.gov/biosample/11603134">https://www.ncbi.nlm.nih.gov/biosample/11603134</a> |
| CTL-0-2   | CTL    | male   | 5            | 0                           | SAMN11603135 | <a href="https://www.ncbi.nlm.nih.gov/biosample/11603135">https://www.ncbi.nlm.nih.gov/biosample/11603135</a> |
| CTL-0-3   | CTL    | male   | 5            | 0                           | SAMN11603136 | <a href="https://www.ncbi.nlm.nih.gov/biosample/11603136">https://www.ncbi.nlm.nih.gov/biosample/11603136</a> |
| CTL-0-4   | CTL    | male   | 5            | 0                           | SAMN11603137 | <a href="https://www.ncbi.nlm.nih.gov/biosample/11603137">https://www.ncbi.nlm.nih.gov/biosample/11603137</a> |
| CTL-1-1   | CTL    | male   | 5            | 1                           | SAMN11603138 | <a href="https://www.ncbi.nlm.nih.gov/biosample/11603138">https://www.ncbi.nlm.nih.gov/biosample/11603138</a> |
| CTL-1-2   | CTL    | male   | 5            | 1                           | SAMN11603139 | <a href="https://www.ncbi.nlm.nih.gov/biosample/11603139">https://www.ncbi.nlm.nih.gov/biosample/11603139</a> |
| CTL-1-3   | CTL    | male   | 5            | 1                           | SAMN11603140 | <a href="https://www.ncbi.nlm.nih.gov/biosample/11603140">https://www.ncbi.nlm.nih.gov/biosample/11603140</a> |
| CTL-1-4   | CTL    | male   | 5            | 1                           | SAMN11603141 | <a href="https://www.ncbi.nlm.nih.gov/biosample/11603141">https://www.ncbi.nlm.nih.gov/biosample/11603141</a> |
| CTL-3-1   | CTL    | male   | 5            | 3                           | SAMN11603142 | <a href="https://www.ncbi.nlm.nih.gov/biosample/11603142">https://www.ncbi.nlm.nih.gov/biosample/11603142</a> |
| CTL-3-2   | CTL    | male   | 5            | 3                           | SAMN11603143 | <a href="https://www.ncbi.nlm.nih.gov/biosample/11603143">https://www.ncbi.nlm.nih.gov/biosample/11603143</a> |
| CTL-3-3   | CTL    | male   | 5            | 3                           | SAMN11603144 | <a href="https://www.ncbi.nlm.nih.gov/biosample/11603144">https://www.ncbi.nlm.nih.gov/biosample/11603144</a> |
| CTL-3-4   | CTL    | male   | 5            | 3                           | SAMN11603145 | <a href="https://www.ncbi.nlm.nih.gov/biosample/11603145">https://www.ncbi.nlm.nih.gov/biosample/11603145</a> |
| CTL-7-1   | CTL    | male   | 5            | 7                           | SAMN11603146 | <a href="https://www.ncbi.nlm.nih.gov/biosample/11603146">https://www.ncbi.nlm.nih.gov/biosample/11603146</a> |
| CTL-7-2   | CTL    | male   | 5            | 7                           | SAMN11603147 | <a href="https://www.ncbi.nlm.nih.gov/biosample/11603147">https://www.ncbi.nlm.nih.gov/biosample/11603147</a> |
| CTL-7-3   | CTL    | male   | 5            | 7                           | SAMN11603148 | <a href="https://www.ncbi.nlm.nih.gov/biosample/11603148">https://www.ncbi.nlm.nih.gov/biosample/11603148</a> |
| CTL-7-4   | CTL    | male   | 5            | 7                           | SAMN11603149 | <a href="https://www.ncbi.nlm.nih.gov/biosample/11603149">https://www.ncbi.nlm.nih.gov/biosample/11603149</a> |
| CTL-14-1  | CTL    | male   | 5            | 14                          | SAMN11603150 | <a href="https://www.ncbi.nlm.nih.gov/biosample/11603150">https://www.ncbi.nlm.nih.gov/biosample/11603150</a> |
| CTL-14-2  | CTL    | male   | 5            | 14                          | SAMN11603151 | <a href="https://www.ncbi.nlm.nih.gov/biosample/11603151">https://www.ncbi.nlm.nih.gov/biosample/11603151</a> |
| CTL-14-3  | CTL    | male   | 5            | 14                          | SAMN11603152 | <a href="https://www.ncbi.nlm.nih.gov/biosample/11603152">https://www.ncbi.nlm.nih.gov/biosample/11603152</a> |
| CTL-14-4  | CTL    | male   | 5            | 14                          | SAMN11603153 | <a href="https://www.ncbi.nlm.nih.gov/biosample/11603153">https://www.ncbi.nlm.nih.gov/biosample/11603153</a> |
| CTL-30-1  | CTL    | male   | 5            | 30                          | SAMN11603154 | <a href="https://www.ncbi.nlm.nih.gov/biosample/11603154">https://www.ncbi.nlm.nih.gov/biosample/11603154</a> |
| CTL-30-2  | CTL    | male   | 5            | 30                          | SAMN11603155 | <a href="https://www.ncbi.nlm.nih.gov/biosample/11603155">https://www.ncbi.nlm.nih.gov/biosample/11603155</a> |
| CTL-30-3  | CTL    | male   | 5            | 30                          | SAMN11603156 | <a href="https://www.ncbi.nlm.nih.gov/biosample/11603156">https://www.ncbi.nlm.nih.gov/biosample/11603156</a> |
| CTL-30-4  | CTL    | male   | 5            | 30                          | SAMN11603157 | <a href="https://www.ncbi.nlm.nih.gov/biosample/11603157">https://www.ncbi.nlm.nih.gov/biosample/11603157</a> |
| CTL-90-1  | CTL    | male   | 5            | 90                          | SAMN11603158 | <a href="https://www.ncbi.nlm.nih.gov/biosample/11603158">https://www.ncbi.nlm.nih.gov/biosample/11603158</a> |
| CTL-90-2  | CTL    | male   | 5            | 90                          | SAMN11603159 | <a href="https://www.ncbi.nlm.nih.gov/biosample/11603159">https://www.ncbi.nlm.nih.gov/biosample/11603159</a> |
| CTL-90-3  | CTL    | male   | 5            | 90                          | SAMN11603160 | <a href="https://www.ncbi.nlm.nih.gov/biosample/11603160">https://www.ncbi.nlm.nih.gov/biosample/11603160</a> |
| CTL-90-4  | CTL    | male   | 5            | 90                          | SAMN11603161 | <a href="https://www.ncbi.nlm.nih.gov/biosample/11603161">https://www.ncbi.nlm.nih.gov/biosample/11603161</a> |
| DN-0-1    | DN     | male   | 5            | 0                           | SAMN11603162 | <a href="https://www.ncbi.nlm.nih.gov/biosample/11603162">https://www.ncbi.nlm.nih.gov/biosample/11603162</a> |
| DN-0-2    | DN     | male   | 5            | 0                           | SAMN11603163 | <a href="https://www.ncbi.nlm.nih.gov/biosample/11603163">https://www.ncbi.nlm.nih.gov/biosample/11603163</a> |
| DN-0-3    | DN     | male   | 5            | 0                           | SAMN11603164 | <a href="https://www.ncbi.nlm.nih.gov/biosample/11603164">https://www.ncbi.nlm.nih.gov/biosample/11603164</a> |
| DN-0-4    | DN     | male   | 5            | 0                           | SAMN11603165 | <a href="https://www.ncbi.nlm.nih.gov/biosample/11603165">https://www.ncbi.nlm.nih.gov/biosample/11603165</a> |
| DN-1-1    | DN     | male   | 5            | 1                           | SAMN11603166 | <a href="https://www.ncbi.nlm.nih.gov/biosample/11603166">https://www.ncbi.nlm.nih.gov/biosample/11603166</a> |
| DN-1-2    | DN     | male   | 5            | 1                           | SAMN11603167 | <a href="https://www.ncbi.nlm.nih.gov/biosample/11603167">https://www.ncbi.nlm.nih.gov/biosample/11603167</a> |
| DN-1-3    | DN     | male   | 5            | 1                           | SAMN11603168 | <a href="https://www.ncbi.nlm.nih.gov/biosample/11603168">https://www.ncbi.nlm.nih.gov/biosample/11603168</a> |
| DN-1-4    | DN     | male   | 5            | 1                           | SAMN11603169 | <a href="https://www.ncbi.nlm.nih.gov/biosample/11603169">https://www.ncbi.nlm.nih.gov/biosample/11603169</a> |
| DN-3-1    | DN     | male   | 5            | 3                           | SAMN11603170 | <a href="https://www.ncbi.nlm.nih.gov/biosample/11603170">https://www.ncbi.nlm.nih.gov/biosample/11603170</a> |
| DN-3-2    | DN     | male   | 5            | 3                           | SAMN11603171 | <a href="https://www.ncbi.nlm.nih.gov/biosample/11603171">https://www.ncbi.nlm.nih.gov/biosample/11603171</a> |
| DN-3-3    | DN     | male   | 5            | 3                           | SAMN11603172 | <a href="https://www.ncbi.nlm.nih.gov/biosample/11603172">https://www.ncbi.nlm.nih.gov/biosample/11603172</a> |
| DN-3-4    | DN     | male   | 5            | 3                           | SAMN11603173 | <a href="https://www.ncbi.nlm.nih.gov/biosample/11603173">https://www.ncbi.nlm.nih.gov/biosample/11603173</a> |
| DN-7-1    | DN     | male   | 5            | 7                           | SAMN11603174 | <a href="https://www.ncbi.nlm.nih.gov/biosample/11603174">https://www.ncbi.nlm.nih.gov/biosample/11603174</a> |
| DN-7-2    | DN     | male   | 5            | 7                           | SAMN11603175 | <a href="https://www.ncbi.nlm.nih.gov/biosample/11603175">https://www.ncbi.nlm.nih.gov/biosample/11603175</a> |
| DN-7-3    | DN     | male   | 5            | 7                           | SAMN11603176 | <a href="https://www.ncbi.nlm.nih.gov/biosample/11603176">https://www.ncbi.nlm.nih.gov/biosample/11603176</a> |
| DN-7-4    | DN     | male   | 5            | 7                           | SAMN11603177 | <a href="https://www.ncbi.nlm.nih.gov/biosample/11603177">https://www.ncbi.nlm.nih.gov/biosample/11603177</a> |
| DN-14-1   | DN     | male   | 5            | 14                          | SAMN11603178 | <a href="https://www.ncbi.nlm.nih.gov/biosample/11603178">https://www.ncbi.nlm.nih.gov/biosample/11603178</a> |
| DN-14-2   | DN     | male   | 5            | 14                          | SAMN11603179 | <a href="https://www.ncbi.nlm.nih.gov/biosample/11603179">https://www.ncbi.nlm.nih.gov/biosample/11603179</a> |
| DN-14-3   | DN     | male   | 5            | 14                          | SAMN11603180 | <a href="https://www.ncbi.nlm.nih.gov/biosample/11603180">https://www.ncbi.nlm.nih.gov/biosample/11603180</a> |
| DN-14-4   | DN     | male   | 5            | 14                          | SAMN11603181 | <a href="https://www.ncbi.nlm.nih.gov/biosample/11603181">https://www.ncbi.nlm.nih.gov/biosample/11603181</a> |
| DN-30-1   | DN     | male   | 5            | 30                          | SAMN11603182 | <a href="https://www.ncbi.nlm.nih.gov/biosample/11603182">https://www.ncbi.nlm.nih.gov/biosample/11603182</a> |
| DN-30-2   | DN     | male   | 5            | 30                          | SAMN11603183 | <a href="https://www.ncbi.nlm.nih.gov/biosample/11603183">https://www.ncbi.nlm.nih.gov/biosample/11603183</a> |
| DN-30-3   | DN     | male   | 5            | 30                          | SAMN11603184 | <a href="https://www.ncbi.nlm.nih.gov/biosample/11603184">https://www.ncbi.nlm.nih.gov/biosample/11603184</a> |
| DN-30-4   | DN     | male   | 5            | 30                          | SAMN11603185 | <a href="https://www.ncbi.nlm.nih.gov/biosample/11603185">https://www.ncbi.nlm.nih.gov/biosample/11603185</a> |
| DN-90-1   | DN     | male   | 5            | 90                          | SAMN11603186 | <a href="https://www.ncbi.nlm.nih.gov/biosample/11603186">https://www.ncbi.nlm.nih.gov/biosample/11603186</a> |
| DN-90-2   | DN     | male   | 5            | 90                          | SAMN11603187 | <a href="https://www.ncbi.nlm.nih.gov/biosample/11603187">https://www.ncbi.nlm.nih.gov/biosample/11603187</a> |

|         |    |      |   |    |              |                                                                                                               |
|---------|----|------|---|----|--------------|---------------------------------------------------------------------------------------------------------------|
| DN-90-3 | DN | male | 5 | 90 | SAMN11603188 | <a href="https://www.ncbi.nlm.nih.gov/biosample/11603188">https://www.ncbi.nlm.nih.gov/biosample/11603188</a> |
| DN-90-4 | DN | male | 5 | 90 | SAMN11603189 | <a href="https://www.ncbi.nlm.nih.gov/biosample/11603189">https://www.ncbi.nlm.nih.gov/biosample/11603189</a> |
